# Supplementary material for: pcMSC Modulates Immune Dysregulation in Patients With COVID-19-Induced Refractory Acute Lung Injury
Source: Front Immunol. 2022 Apr 29;13:871828. doi: 10.3389/fimmu.2022.871828 (PMC9109702; doi:10.3389/fimmu.2022.871828)
Supplement: Supplementary file 2 [file Table_1.xlsx]

## Sheet: 工作表1
Sample	Row	Column	IL-22 | OD			IL-18 | OD			IL-17A | OD			IL-5 | OD			IL-4 | OD			IFNg | OD			IL-2 | OD			TNFa | OD			IL-6 | OD			IL-10 | OD			IL-1b | OD			IL-13 | OD
standard 0	G	8	630.49			677.88			36.805			162.87			2.73			44.795			67.13			103.245			0			293.265			22.145			173.92
standard 1	E	8	1122.46			385.665			219.605			834.73			22.735			309.02			187.49			323.21			66.765			890.765			407.56			1188.53
standard 2	C	8	2860.74			1256.29			519.89			4356.69			1255.42			740.16			853.5			734.39			315.065			3485.1			1086.02			6063.5
standard 3	A	8	5389.23			2631.06			1545.67			8999.72			2771.16			1101.99			2234.53			1803.34			680.545			6721.6			2570.18			25537.4
standard 4	G	7	8529.08			4917.41			2501.57			13267.9			5995.33			2222.26			3990.39			4015.56			1443.89			11338			4042.16			6978.09
standard 5	E	7	13649.4			9171.15			5148.32			24750.2			14316.3			3643.76			9632.02			8833.18			3666.3			20386.9			7043.23			14765.3
standard 6	C	7	18764.9			14750.2			10281.7			39981.2			29106.6			7526.27			18984.6			16716.4			9044.53			32455.2			11107.6			36257.5
standard 7	A	7	23991.2			19250.7			15429.2			49744.2			48060.6			15477			28150.3			30466.3			16121			45160.6			15645.5			80080.6
				conc			conc			conc			conc			conc			conc			conc			conc			conc			conc			conc			conc
patient 2 before	A	9	742.56	7.08006	7.41849	975.1	119.018	123.159	175.86	14.4611	14.8611	99.5	1.24248	1.15276	32.06	8.0381	8.16954	526.34	29.0491	25.7064	319.12	24.676	27.3373	121.95	4.7529	4.49345	14900.1	1577.79	1722.88	523.23	19.6973	20.6813	33.32	5.14613	5.17223	380.13	2.45449	2.23955
patient 2 before	B	9	780.22	7.75692		1023.01	127.3		187.69	15.2612		93.5	1.06304		38.63	8.30097		414.96	22.3636		392.67	29.9987		109.51	4.23401		16632.7	1867.96		576	21.6654		34.419	5.19833		347.06	2.02462
patient 2 1st	C	9	791.05	7.95179	7.61157	1021.06	126.963	124.125	186.74	15.1969	14.0111	151.98	2.81328	2.83395	45.73	8.58465	8.30657	371.38	19.7953	26.2007	179.98	14.3643	14.131	118.12	4.59336	4.80829	11997.1	1268.06	1320.91	1167.47	43.8949	33.0668	25.37	4.76867	5.01226	330.51	1.8097	1.79886
patient 2 1st	D	9	753.21	7.27135		988.21	121.286		151.65	12.8253		153.36	2.85462		31.82	8.02849		584.41	32.606		173.79	13.8977		128.45	5.02323		13074	1373.75		591.36	22.2387		35.63	5.25585		328.84	1.78802
patient 2 2nd	E	9	761.78	7.42535	7.3894	1245.18	165.455	167.979	177.96	14.6031	15.6781	123.88	1.97194	2.07042	201.33	14.7033	13.27	155.44	7.44654	7.69837	199.22	15.8102	16.2247	147.53	5.81367	6.32503	10166.3	1099.68	1037.45	900.66	33.8284	26.4256	20.55	4.53996	4.47378	379.31	2.44383	2.15877
patient 2 2nd	F	9	757.78	7.35346		1274.74	170.502		209.73	16.7531		130.46	2.16889		127.85	11.8368		164.46	7.9502		210.29	16.6391		172.38	6.83639		8765.91	975.219		505.13	19.0228		17.76	4.40761		335.44	1.8737
patient 1 before	G	9	833.22	8.71155	8.86066	1195	156.872	181.571	686.1	49.412	32.5565	101.91	1.31457	1.30455	289.91	18.1074	15.7142	120.84	5.52409	7.04915	262.73	20.5367	21.9243	153.94	6.07821	6.40582	8127.35	918.737	981.402	368.89	13.9551	15.6773	68.76	6.832	6.59412	320.98	1.68601	1.86343
patient 1 before	H	9	849.75	9.00978		1485.3	206.271		194.19	15.701		101.24	1.29453		165.77	13.3211		175.61	8.57422		300.46	23.312		169.87	6.73343		9543.09	1044.07		461.54	17.3996		58.77	6.35624		348.31	2.04085
patient 1 1st	A	10	817.41	8.42653	8.44184	1152.94	149.662	188.764	217.05	17.249	16.2443	157.33	2.97354	2.89191	181.01	13.9146	12.8873	161.63	7.79207	8.50325	244.05	19.1537	21.2428	182.69	7.2585	7.4151	9302.33	1022.7	1054.6	292.54	11.1223	11.8239	18.97	4.46501	4.41995	333.79	1.85228	2.13271
patient 1 1st	B	10	819.11	8.45716		1613.29	227.865		187.37	15.2395		151.88	2.81029		128.44	11.86		187.02	9.21443		300.73	23.3318		190.36	7.5717		10019.3	1086.51		330.38	12.5256		17.07	4.37489		376.95	2.41313
patient 1 2nd	C	10	746.22	7.14579	7.1087	806.08	89.6368	88.8622	166.36	13.819	13.4042	80.5	0.674332	0.395778	100.25	10.7496	10.2632	89.31	3.78524	4.15757	193.68	15.3945	14.7607	138.11	5.424	5.3498	901.628	166.423	184.274	220.74	8.46288	9.29173	21.98	4.6078	4.54613	437.47	3.20122	3.37784
patient 1 2nd	D	10	742.09	7.07162		797.21	88.0876		154.08	12.9894		61.86	0.117224		75.68	9.77686		102.84	4.52989		176.83	14.1269		134.53	5.27561		1144.79	202.126		265.51	10.1206		19.38	4.48445		464.55	3.55447
patient 3 before	E	10	708.29	6.46518	6.7631	2574.04	387.154	381.118	221.33	17.5391	17.1749	215.37	4.71358	4.50105	99.88	10.735	10.9071	3386.73	272.004	247.953	265.35	20.7301	20.4656	107.92	4.16754	4.49019	14619.4	1543.23	1527.81	3084.44	118.173	122.761	79.99	7.36732	7.13588	361.41	2.21108	2.29891
patient 3 before	F	10	741.5	7.06103		2500.37	375.083		210.58	16.8107		201.2	4.28851		108.6	11.0791		2912.66	223.902		258.19	20.2011		123.39	4.81283		14358.3	1512.4		3315.03	127.348		70.28	6.90443		374.92	2.38673
patient 3 1st	G	10	799.9	8.11111	7.7348	2317.93	345.101	349.185	226.76	17.9071	19.1153	359.86	9.05717	9.11876	114.15	11.2979	11.7826	2769.81	209.605	220.043	240.35	18.8791	19.441	137.04	5.37966	5.31789	11673.7	1237.52	1279.56	1531.16	57.7211	59.1845	41.76	5.54713	6.1355	342.62	1.96694	2.00591
patient 3 1st	H	10	758.06	7.35849		2367.55	353.269		262.37	20.3235		363.95	9.18036		138.82	12.2673		2977.9	230.481		255.51	20.0028		134.06	5.25612		12551.6	1321.61		1607.74	60.648		66.49	6.72386		348.62	2.04488
patient 3 2nd	A	11	750.2	7.21727	6.94228	1956.78	285.333	271.538	222.33	17.6068	17.5536	345.1	8.61268	7.44932	656.36	31.6581	20.9678	2356.66	169.58	151.09	200.72	15.9226	16.4225	135.16	5.30173	5.19903	11553.6	1226.28	1196.25	1390.07	52.343	49.7429	44.71	5.68737	5.5885	365.02	2.25801	2.65108
patient 3 2nd	B	11	719.56	6.66728		1791.38	257.744		220.76	17.5004		267.74	6.28595		88.31	10.2775		1946.61	132.599		214.08	16.9224		130.21	5.09634		10902.4	1166.22		1253.19	47.1428		40.55	5.48963		425.42	3.04415
patient 4 before	C	11	1819.62	26.9359	23.4296	956.32	115.766	124.08	167.83	13.9183	14.3175	88.57	0.915612	0.746693	63.28	9.28413	10.3138	199.72	9.92898	9.36681	1099.97	77.6247	78.5491	132.92	5.20882	5.48543	13339.4	1401.02	1326.21	559.26	21.0408	20.7435	49.82	5.93037	5.75824	354.28	2.11842	2.28106
patient 4 before	D	11	1445.72	19.9233		1052.53	132.393		179.64	14.7167		77.27	0.577774		115.31	11.3436		179.72	8.80463		1129.11	79.4734		146.28	5.76203		11821.2	1251.39		543.32	20.4463		42.58	5.58611		379.3	2.4437
patient 4 1st	E	11	2151.87	33.2799	33.6357	2224.12	329.633	303.69	544.16	39.6006	28.8369	156.19	2.93939	2.97354	50.44	8.77262	10.2904	68.38	2.63776	1.80485	183.02	14.5932	14.7523	107.9	4.16671	4.68403	6263.24	751.69	745.941	1457.77	54.9213	32.8715	23.39	4.67471	4.76607	824.29	8.28459	8.68447
patient 4 1st	F	11	2188.79	33.9915		1911.21	277.746		229.21	18.0732		158.47	3.00769		127.12	11.8081		37.82	0.971936		187.25	14.9114		132.74	5.20136		6137.56	740.193		284.43	10.8216		27.24	4.85743		884.59	9.08434
patient 4 2nd	G	11	1707.21	24.8138	26.1993	1257.77	167.605	162.579	233.73	18.3797	17.8272	107.25	1.47431	1.44126	148.29	12.6382	18.3173	75.02	3.00121	3.26333	252.79	19.8015	21.2859	137.53	5.39997	5.44408	1941.66	307.725	287.361	150.67	5.87192	15.4438	20.5	4.53759	4.70107	2117.73	25.8996	26.0509
patient 4 2nd	H	11	1853.86	27.5848		1198.98	157.553		217.43	17.2748		105.04	1.4082		446.48	23.9964		84.58	3.52545		293.07	22.7703		139.66	5.48819		1621.09	266.998		665.68	25.0157		27.39	4.86455		2139.33	26.2023
patient 5 before	A	12	785.44	7.85083	7.77087	2346.77	349.85	333.798	183.47	14.9757	14.498	76.04	0.541007	0.324783	52.76	8.86514	9.09432	170.23	8.27292	11.0692	292.3	22.7138	23.6208	136.44	5.3548	5.40141	2262.05	346.575	338.266	856.86	32.182	33.4421	36.85	5.31381	5.34731	343.26	1.97526	1.87437
patient 5 before	B	12	776.55	7.6909		2152.19	317.747		169.34	14.0204		61.57	0.108559		64.27	9.32351		269.03	13.8655		317.09	24.5279		138.69	5.44802		2123.3	329.956		923.89	34.7023		38.26	5.3808		327.72	1.77348
patient 5 1st	C	12	725.65	6.77653	7.10049	1746.22	250.185	246.206	156.21	13.1333	21.6556	285.44	6.81788	7.04759	25.83	7.78851	8.20914	157.22	7.54585	5.87895	200.96	15.9406	21.4489	1122.22	41.7444	45.1727	8000.53	907.504	916.648	343.29	13.0047	25.7363	48.87	5.88518	5.55555	351.01	2.07593	2.44749
patient 5 1st	D	12	761.73	7.42445		1698.75	242.227		406.92	30.178		300.72	7.27729		46.86	8.62976		97.07	4.21205		350.5	26.9572		1329.69	48.6011		8207.03	925.791		1023.84	38.4679		35	5.22592		408.14	2.81904
patient 5 2nd	E	12	744.87	7.12154	7.21387	1104.01	141.257	142.553	155.69	13.0981	13.4167	111.14	1.5907	1.93488	49.06	8.71756	8.2809	66.59	2.53987	2.53358	238.26	18.7239	19.2586	123.18	4.80409	4.53096	6053.85	732.512	754.289	701.02	26.338	25.8708	15.43	4.29711	4.29166	376.96	2.41326	2.55287
patient 5 2nd	F	12	755.15	7.3062		1119.09	143.85		165.12	13.7352		134.14	2.27906		27.22	7.84423		66.36	2.5273		252.68	19.7934		110.08	4.25783		6531.16	776.067		676.05	25.4036		15.2	4.28621		398.42	2.69249
		158.08													447.78	131.62											3725.01	1577.79	1722.88
																											4158.18	1867.96
															338.895	22.735
																											2999.27	1268.06	1320.91
															1571.59	1255.42											3268.49	1373.75
															3087.32	2771.16											2541.58	1099.68	1037.45
																											2191.48	975.219
															6311.49	5995.33
																											2031.84	918.737	981.402
															14632.5	14316.3											2385.77	1044.07
															29422.8	29106.6											2325.58	1022.7	1054.6
																											2504.82	1086.51
															48376.8	48060.6
																											225.407	166.423	184.274
																											286.196	202.126
																											3654.86	1543.23	1527.81
																											3589.59	1512.4
																											2918.43	1237.52	1279.56
																											3137.89	1321.61
																											2888.4	1226.28	1196.25
																											2725.61	1166.22
																											3334.86	1401.02	1326.21
																											2955.3	1251.39
																											1565.81	751.69	745.941
																											1534.39	740.193
																											485.415	307.725	287.361
																											405.273	266.998
																											565.513	346.575	338.266
																											530.826	329.956
																											2000.13	907.504	916.648
																											2051.76	925.791
																											1513.46	732.512	754.289
																											1632.79	776.067
